# Supplementary material for: A descriptive survey of patient experiences and access to specialty medicines with alternative funding programs
Source: bioRxiv or medRxiv preprint supplement (doi:10.1101/2024.06.28.24309668), 2024-06-30
Supplement: Supplementary file [file media-1.pdf]

## Supplementary Appendix

Supplementary Table 1. Screener Attrition Table

| Screener Attrition Steps                                    | n (% of previous step) |
|-------------------------------------------------------------|------------------------|
| Total patients screened <sup>a</sup>                        | 7,546                  |
| Employer- or union-sponsored insurance                      | 3,686 (48)             |
| Chronic condition treated with specialty medication         | 3,230 (88)             |
| Specialty medication excluded from coverage <sup>b</sup>    | 365 (11)               |
| Contact with AFP vendor to help enroll in free drug program | 231 (63)               |
| Provided consent and answered $\geq 1$ question             | 227 (98)               |

<sup>a</sup>HOPE, n = 718; RPV, n = 6,828.

<sup>b</sup>Not if it was part of step therapy.

AFP = alternative funding program; HOPE = Hope for Hemophilia; RPV = Rare Patient Voice.
